# Supplementary material for: PacBio genome sequencing reveals new insights into the genomic organisation of the multi-copy ToxB gene of the wheat fungal pathogen Pyrenophora tritici-repentis
Source: PubMed Central journal article supplement (PMC7507622; doi:10.1186/s12864-020-07029-4), 2020-09-21

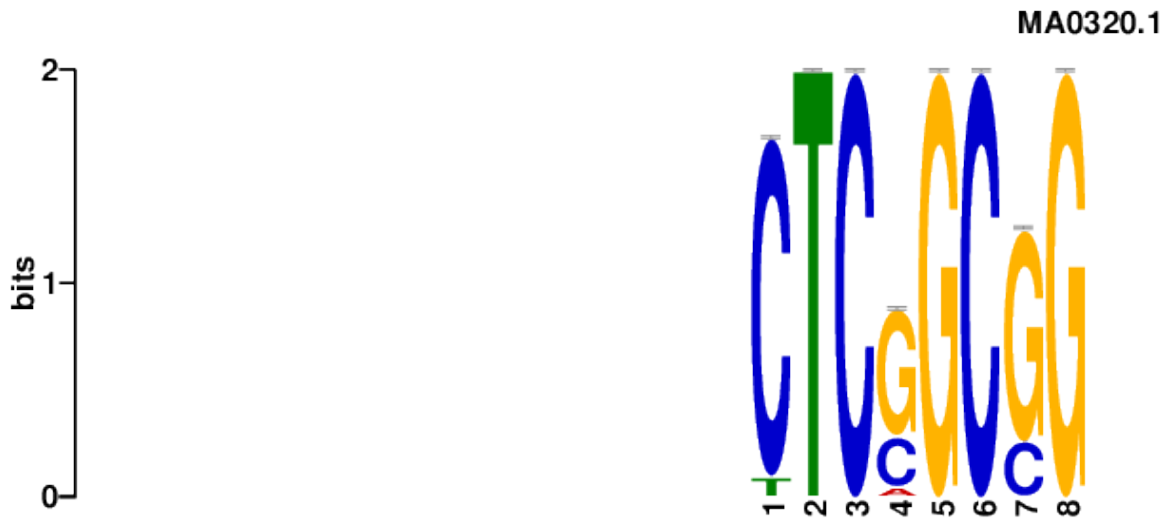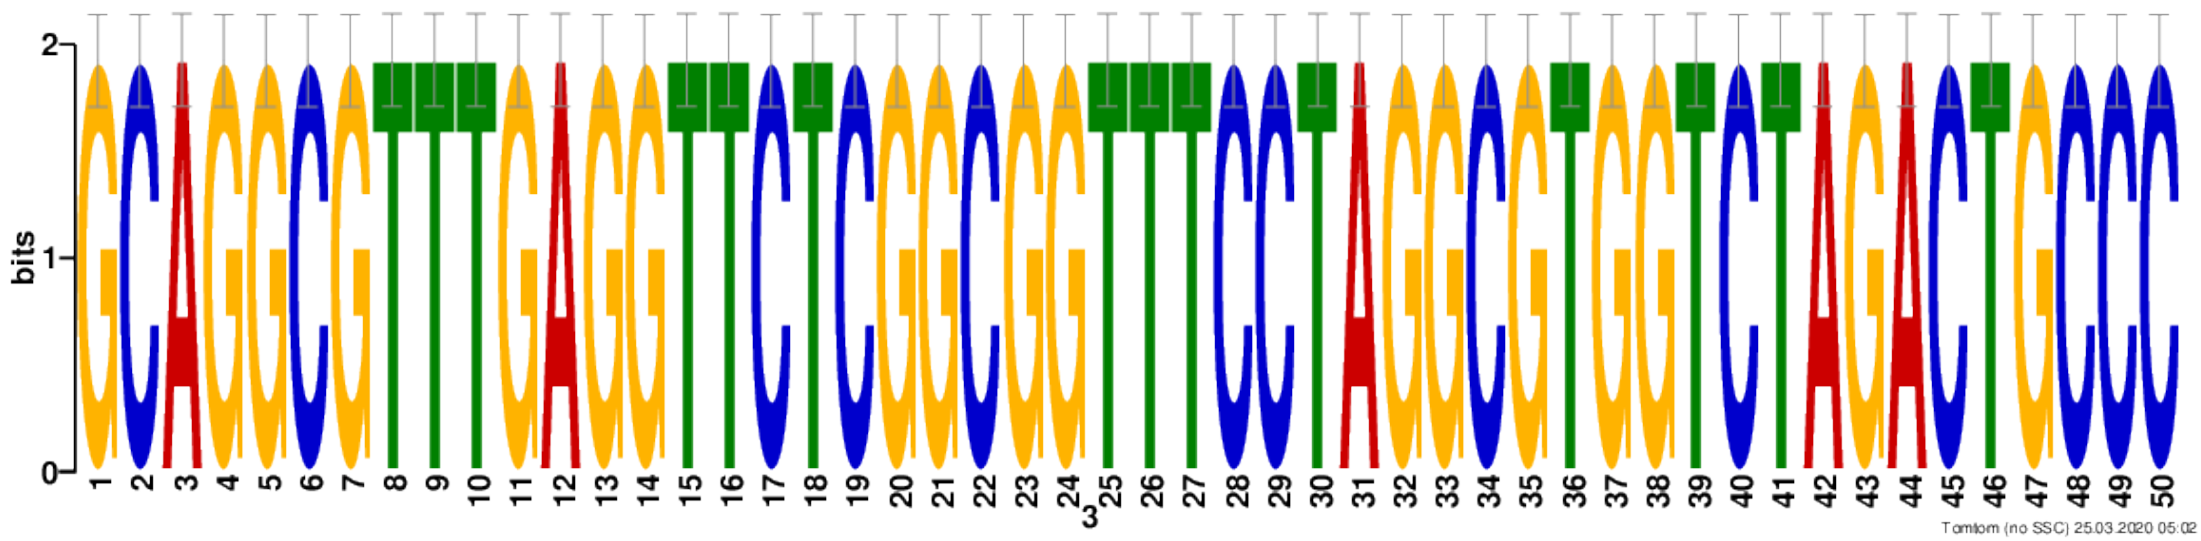

Supplement: 12864_2020_7029_MOESM2_ESM.pdf [file 12864_2020_7029_MOESM2_ESM.pdf]
